# Supplementary material for: Browning of white adipocytes by gold nanocluster mediated electromagnetic induction heating hyperthermia
Source: Royal Society of Chemistry journal article supplement (doi:10.1039/d1nr07263c), 2021-12-13
Supplement: d1nr07263c1.pdf [file d1nr07263c1.pdf]

## **Electronic Supplementary Information (ESI)**

### **Browning of White Adipocytes by Gold Nanoclusters Mediated Electromagnetic Induction Heating Hyperthermia**

Tiantian Xue,<sup>†</sup> Hejie Xu,<sup>†</sup> Yanhui Du, Jialuo Ding, Yu Su, and Zhenkun Lin\*

Research Center of Basic Medicine, The Second Affiliated Hospital of Wenzhou  
Medical University, Wenzhou 325027, China.

\* Corresponding author. E-mail address: zklin@wmu.edu.cn (Z. Lin)

<sup>†</sup> The authors contributed to this work equally.

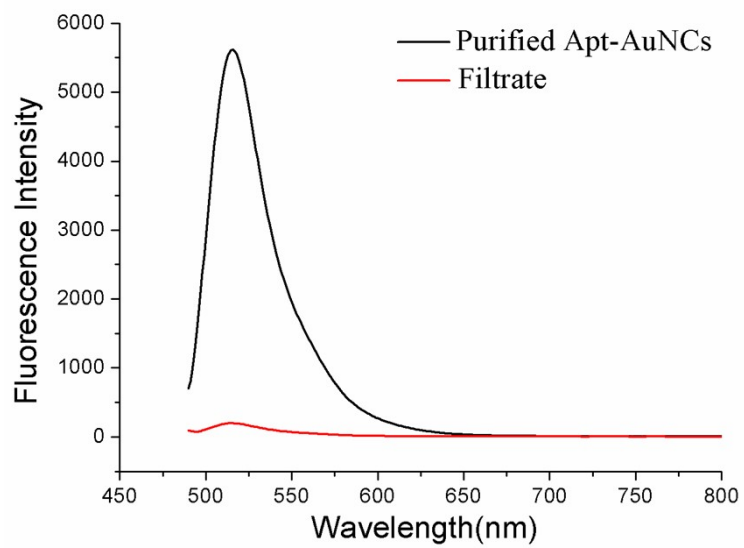

**Figure S1.** Fluorescence spectra of purified Apt-AuNCs and filtrate from centrifugation of the crude product ( $\lambda_{\text{ex}} = 480 \text{ nm}$ ). Aptamer was labeled with FAM ( $\lambda_{\text{ex}} = 480 \text{ nm}$ ,  $\lambda_{\text{em}} = 520 \text{ nm}$ ).

**Table S1.** Information for MA-33 aptamer and two random ssDNA that used in modification of AuNCs.

| Name                       | Sequence (5'-3')                          |
|----------------------------|-------------------------------------------|
| MA-33 aptamer <sup>a</sup> | GTTACCGCGGTGAAGGGTGGATGTGTCTGGACGCTATATC  |
| Random ssDNA-1             | GCCCCTAGGGGGTGTTC AACAGGAGTATTATGATCCTTAG |
| Random ssDNA-2             | TATGAATAGAGCATTGATGAGGAGGAGGGATAAAGGGGA   |

<sup>a</sup> The sequence of MA-33 aptamer is from “Kim, E.Y., et al., Selection of aptamers for mature white adipocytes by cell SELEX using flow cytometry. PLoS One, 2014. **9**(5): p. e97747.”

**Table S2.** Information for the primer sequences used in real-time PCR analysis.

| Gene           | Forward Primer         | Reverse Primer           |
|----------------|------------------------|--------------------------|
| UCP1           | AGGCTTCCAGTACCATTAGGT  | CTGAGTGAGGCAAAGCTGATTT   |
| CIDEA          | TGCTCTTCTGTATCGCCCAGT  | GCCGTGTTAAGGAATCTGCTG    |
| COX8b          | TGTGGGGATCTCAGCCATAGT  | AGTGGGCTAAGACCCATCCTG    |
| FGF21          | AGGATGGAACAGTGGTAGGCG  | GGCTTTGACACCCAGGATTTG    |
| CEBP $\alpha$  | TTGGTTTTGCTCTGATTCTTGC | CCACTTCATTTTCATTGGTCCTCT |
| CEBP $\beta$   | AGATGTTCCCTGCGGGGTTG   | CGAAACGGAAAAGGTTCTCAA    |
| PGC-1 $\alpha$ | AGCCGTGACCACTGACAACGAG | GCTGCATGGTTCTGAGTGCTAAG  |
| PRDM16         | CCACCAGCGAGGACTTCAC    | GGAGGACTCTCGTAGCTCGAA    |
| PPAR $\gamma$  | GTGCCAGTTTCGATCCGTAGA  | GGCCAGCATCGTGTAGATGA     |
| GAPDH          | AGGTCGGTGTGAACGGATTTG  | TGTAGACCATGTAGTTGAGGTCA  |
